# Supplementary material for: Assessment of Tumor Mutational Burden and Outcomes in Patients With Diverse Advanced Cancers Treated With Immunotherapy
Source: PubMed Central journal article supplement — JAMA Netw Open. 2023 May 2;6(5):e2311181. doi: 10.1001/jamanetworkopen.2023.11181 (PMC10155064; doi:10.1001/jamanetworkopen.2023.11181), 2023-05-02

## Supplemental Online Content

Aggarwal C, Ben-Shachar R, Gao Y, et al. Assessment of tumor mutational burden and outcomes in patients with diverse advanced cancers treated with immunotherapy. *JAMA Network Open*. 2023;6(5):e2311181. doi:10.1001/jamanetworkopen.2023.11181

**eTable 1.** Histologies by Cancer Type in the Evaluable Cohort

**eTable 2.** FDA-Approved Medications Approved by Cancer Type and Line of Therapy Used for Cohort Definition

**eTable 3.** End Point Event Definitions

**eTable 4.** End Point Censoring Definitions

**eTable 5.** Histologies by Cancer Type in the Prospective Cohort

**eTable 6.** Medications by Cancer Type in the Evaluable Cohort

**eTable 7.** Medications by Cancer Type in the Prospective Cohort

**eTable 8.** Patient Summary in the Evaluable Cohort

**eTable 9.** Patient Summary in the Evaluable Cohort by Cancer Type

**eTable 10.** Patient Summary in the Prospective Cohort by Cancer Type

**eTable 11.** Univariate Cox-Proportional Hazards Models

**eTable 12.** Multivariable Cox-Proportional Hazards Models

**eFigure 1.** Kaplan-Meier (KM) Analysis of OS by TMB Status in the Evaluable Cohort in First-Line and Second-Line Treated Patients

**eFigure 2.** Kaplan-Meier (KM) Analysis of Clinical Outcomes by TMB Status in the Prospective Cohort in First-Line and Second-Line Treated Patients

**eFigure 3.** Assessment of Overall Survival by TMB-Status in Each Cancer Indication in the Evaluable Cohort

**eFigure 4.** Kaplan-Meier (KM) Analysis of Clinical Outcomes by TMB Status in the Prospective Cohort in Pembrolizumab and Non-pembrolizumab Treated Patients

This supplemental material has been provided by the authors to give readers additional information about their work.

**eTable 1.** Histologies by Cancer Type in the Evaluable Cohort  
(N=674)

|                                                                  | NSCLC          | Bladder        | HNSCC         | Melanoma   | CRC            | Gastric      | EC           | Cervical      |
|------------------------------------------------------------------|----------------|----------------|---------------|------------|----------------|--------------|--------------|---------------|
| <b>Adenocarcinoma</b>                                            | 235<br>(71.2%) | 3 (2.0%)       | 2 (2.1%)      | 0          | 39<br>(100.0%) | 6<br>(85.7%) | 4<br>(80.0%) | 1<br>(100.0%) |
| <b>Squamous cell carcinoma</b>                                   | 65<br>(19.7%)  | 2 (1.3%)       | 90<br>(93.7%) | 0          | 0              | 0            | 0            | 0             |
| <b>Transitional cell carcinoma</b>                               | 0              | 103<br>(69.5%) | 0             | 0          | 0              | 0            | 0            | 0             |
| <b>Malignant melanoma, metastatic</b>                            | 0              | 0              | 0             | 34 (70.8%) | 0              | 0            | 0            | 0             |
| <b>Non-small cell carcinoma</b>                                  | 30<br>(9.1%)   | 1 (0.7%)       | 1<br>(1.04%)  | 0          | 0              | 0            | 0            | 0             |
| <b>Papillary transitional cell carcinoma</b>                     | 0              | 22<br>(14.9%)  | 0             | 0          | 0              | 0            | 0            | 0             |
| <b>Malignant melanoma</b>                                        | 0              | 0              | 0             | 12 (25.0%) | 0              | 0            | 0            | 0             |
| <b>Carcinoma</b>                                                 | 0              | 10 (6.8%)      | 0             | 0          | 0              | 0            | 0            | 0             |
| <b>Transitional cell carcinoma with squamous differentiation</b> | 0              | 2 (1.3%)       | 0             | 0          | 0              | 0            | 0            | 0             |
| <b>Nodular melanoma</b>                                          | 0              | 0              | 0             | 1 (2.1%)   | 0              | 0            | 0            | 0             |
| <b>Endometrioid carcinoma</b>                                    | 0              | 0              | 0             | 0          | 0              | 0            | 1<br>(20.0%) | 0             |
| <b>Transitional cell carcinoma, micropapillary</b>               | 0              | 1 (0.7%)       | 0             | 0          | 0              | 0            | 0            | 0             |
| <b>Signet ring cell carcinoma</b>                                | 0              | 0              | 0             | 0          | 0              | 1<br>(14.3%) | 0            | 0             |
| <b>Transitional cell carcinoma, spindle cell</b>                 | 0              | 1 (0.7%)       | 0             | 0          | 0              | 0            | 0            | 0             |
| <b>Papillary carcinoma</b>                                       | 0              | 1 (0.7%)       | 0             | 0          | 0              | 0            | 0            | 0             |
| <b>Carcinoma, undifferentiated</b>                               | 0              | 0              | 1<br>(1.04%)  | 0          | 0              | 0            | 0            | 0             |

|                                                            |   |          |              |          |   |   |   |   |
|------------------------------------------------------------|---|----------|--------------|----------|---|---|---|---|
| <b>Large cell carcinoma</b>                                | 0 | 0        | 1<br>(1.04%) | 0        | 0 | 0 | 0 | 0 |
| <b>Papillary transitional cell carcinoma, non-invasive</b> | 0 | 1 (0.7%) | 0            | 0        | 0 | 0 | 0 | 0 |
| <b>Superficial spreading melanoma</b>                      | 0 | 0        | 0            | 1 (2.1%) | 0 | 0 | 0 | 0 |
| <b>Transitional cell carcinoma in situ</b>                 | 0 | 1 (0.7%) | 0            | 0        | 0 | 0 | 0 | 0 |
| <b>Basaloid carcinoma</b>                                  | 0 | 0        | 1<br>(1.04%) | 0        | 0 | 0 | 0 | 0 |

**eTable 2.** FDA-Approved Medications Approved by Cancer Type and Line of Therapy Used for Cohort Definition

|                               | <b>NSCLC</b> | <b>Bladder</b> | <b>HNSCC</b> | <b>Melanoma</b> | <b>CRC</b> | <b>Gastric</b> | <b>EC</b> | <b>Cervical</b> |
|-------------------------------|--------------|----------------|--------------|-----------------|------------|----------------|-----------|-----------------|
| <b>pembrolizumab</b>          | 1L           | 1L, 2L         | 1L, 2L       | 1L              | 1L, 2L     | 2L             | 2L        | 2L              |
| <b>atezolizumab</b>           | 1L           | 1L             |              |                 |            |                |           |                 |
| <b>cemiplimab</b>             | 1L           |                |              |                 |            |                |           |                 |
| <b>nivolumab</b>              |              | 2L             | 2L           | 1L              | 1L, 2L     | 2L             |           |                 |
| <b>avelumab</b>               |              | 2L             |              |                 |            |                |           |                 |
| <b>ipilimumab</b>             |              |                |              | 1L              |            |                |           |                 |
| <b>ipilimumab + nivolumab</b> | 1L           |                |              | 1L              | 1L, 2L     |                |           |                 |

**eTable 3.** End Point Event Definitions

| <b>End Point</b> | <b>Event Definition</b>                                                 |
|------------------|-------------------------------------------------------------------------|
| OS               | Death event $\geq$ two weeks after IO start                             |
| PFS              | Earliest of: Progression or death event $\geq$ two weeks after IO start |
| TTP              | Progression event $\geq$ two weeks after IO start                       |

**eTable 4.** End Point Censoring Definitions

| <b>End Point</b> | <b>Right Censoring Definition</b>                                                                                                                                                                                                                                                   |
|------------------|-------------------------------------------------------------------------------------------------------------------------------------------------------------------------------------------------------------------------------------------------------------------------------------|
| OS               | Last known date                                                                                                                                                                                                                                                                     |
| PFS              | Earliest of: IO medication end date, date of ongoing IO treatment*, start of the next line of therapy, treatment discontinuation, or last known date. All patients with no last known date or event within one year of IO start for 1L and within 6 months for 2L will be censored. |
| TTP              | Earliest of: IO medication end date, date of ongoing IO treatment*, start of the next line of therapy, treatment discontinuation, or last known date. All patients with no last known date or event within one year of IO start for 1L and within 6 months for 2L will be censored. |

\*This record is available only if no medication end date, treatment discontinuation, or start of next line therapy is available

**eTable 5.** Histologies by Cancer Type in the Prospective Cohort  
(N=403)

|                                              | <b>NSCLC</b>   | <b>Bladder</b> | <b>HNSCC</b>  | <b>Melanoma</b> | <b>CRC</b>     | <b>Gastric</b> | <b>EC</b> |
|----------------------------------------------|----------------|----------------|---------------|-----------------|----------------|----------------|-----------|
| <b>Adenocarcinoma</b>                        | 178<br>(73.6%) | 2 (2.6%)       | 2 (4.7%)      | 0               | 23<br>(100.0%) | 0              | 2 (66.7%) |
| <b>Squamous cell carcinoma</b>               | 41<br>(16.9%)  | 0              | 39<br>(90.7%) | 0               | 0              | 0              | 0         |
| <b>Transitional cell carcinoma</b>           | 0              | 56<br>(72.7%)  | 0             | 0               | 0              | 0              | 0         |
| <b>Malignant melanoma, metastatic</b>        | 0              | 0              | 0             | 12 (85.7%)      | 0              | 0              | 0         |
| <b>Non-small cell carcinoma</b>              | 23<br>(9.5%)   | 1 (1.3%)       | 0             | 0               | 0              | 0              | 0         |
| <b>Papillary transitional cell carcinoma</b> | 0              | 13<br>(16.9%)  | 0             | 0               | 0              | 0              | 0         |
| <b>Malignant melanoma</b>                    | 0              | 0              | 0             | 2 (14.3%)       | 0              | 0              | 0         |
| <b>Carcinoma</b>                             | 0              | 5 (6.5%)       | 0             | 0               | 0              | 0              | 0         |
| <b>Endometrioid carcinoma</b>                | 0              | 0              | 0             | 0               | 0              | 0              | 1 (33.3%) |
| <b>Signet ring cell carcinoma</b>            | 0              | 0              | 0             | 0               | 0              | 1<br>(100.0%)  | 0         |
| <b>Carcinoma, undifferentiated</b>           | 0              | 0              | 1 (2.3%)      | 0               | 0              | 0              | 0         |
| <b>Large cell carcinoma</b>                  | 0              | 0              | 1 (2.3%)      | 0               | 0              | 0              | 0         |

**eTable 6.** Medications by Cancer Type in the Evaluable Cohort  
(N=674)

|                               | <b>NSCLC</b>   | <b>Bladder</b> | <b>HNSCC</b>  | <b>Melanoma</b> | <b>CRC</b>    | <b>Gastric</b> | <b>EC</b>     | <b>Cervical</b> |
|-------------------------------|----------------|----------------|---------------|-----------------|---------------|----------------|---------------|-----------------|
| <b>pembrolizumab</b>          | 295<br>(89.4%) | 118<br>(79.7%) | 87<br>(90.6%) | 14 (29.2%)      | 33<br>(84.6%) | 7<br>(100.0%)  | 5<br>(100.0%) | 1<br>(100.0%)   |
| <b>Ipilimumab + nivolumab</b> | 27 (8.2%)      | 0              | 0             | 23 (47.9%)      | 3<br>(7.7%)   | 0              | 0             | 0               |
| <b>nivolumab</b>              | 0              | 6 (4.1%)       | 9 (9.4%)      | 10 (20.8%)      | 3<br>(7.7%)   | 0              | 0             | 0               |
| <b>atezolizumab</b>           | 6 (1.8%)       | 11<br>(7.4%)   | 0             | 0               | 0             | 0              | 0             | 0               |
| <b>avelumab</b>               | 0              | 13<br>(8.8%)   | 0             | 0               | 0             | 0              | 0             | 0               |
| <b>cemiplimab</b>             | 2 (0.6%)       | 0              | 0             | 0               | 0             | 0              | 0             | 0               |
| <b>ipilimumab</b>             | 0              | 0              | 0             | 1 (2.1%)        | 0             | 0              | 0             | 0               |

**eTable 7.** Medications by Cancer Type in the Prospective Cohort  
(N = 403)

|                                   | <b>NSCLC</b> | <b>Bladder</b> | <b>HNSCC</b>  | <b>Melanoma</b> | <b>CRC</b>    | <b>Gastric</b> | <b>EC</b>     |
|-----------------------------------|--------------|----------------|---------------|-----------------|---------------|----------------|---------------|
| <b>pembrolizumab</b>              | 212 (87.60%) | 61<br>(79.2%)  | 40<br>(93.0%) | 3 (21.4%)       | 19<br>(82.6%) | 1<br>(100.0%)  | 3<br>(100.0%) |
| <b>Ipilimumab +<br/>nivolumab</b> | 25 (10.33%)  | 0              | 0             | 6 (42.9%)       | 2 (8.7%)      | 0              | 0             |
| <b>nivolumab</b>                  | 0            | 3 (3.9%)       | 3 (7.0%)      | 5 (35.7%)       | 2 (8.7%)      | 0              | 0             |
| <b>atezolizumab</b>               | 3 (1.24%)    | 3 (3.9%)       | 0             | 0               | 0             | 0              | 0             |
| <b>avelumab</b>                   | 0            | 10<br>(13.0%)  | 0             | 0               | 0             | 0              | 0             |
| <b>cemiplimab</b>                 | 2 (0.83%)    | 0              | 0             | 0               | 0             | 0              | 0             |



**eTable 8.** Patient Summary in the Evaluable Cohort

(N = 674)

| Clinical characteristic             |                                | All Evaluable<br>(N=674) | TMB-H<br>Evaluable<br>(N=206) | TMB-L<br>Evaluable<br>(N=468) | P Value |
|-------------------------------------|--------------------------------|--------------------------|-------------------------------|-------------------------------|---------|
| <b>Age at start of IO<br/>(yrs)</b> | Median (range)                 | 69.4 (28.6,<br>89.8)     | 69.6 (29.0,<br>89.7)          | 69.2 (28.6,<br>89.8)          | 0.95*   |
| <b>Sex, N (%)</b>                   | Female                         | 271 (40.2%)              | 84 (40.8%)                    | 187<br>(40.0%)                | 0.91    |
| <b>Race/Ethnicity, N<br/>(%)</b>    | Asian                          | 14 (2.1%)                | 3 (1.5%)                      | 11 (2.4%)                     | 0.02    |
|                                     | Black or African<br>American   | 47 (7.0%)                | 20 (9.7%)                     | 27 (5.8%)                     |         |
|                                     | Hispanic or Latino             | 15 (2.2%)                | 7 (3.4%)                      | 8 (1.7%)                      |         |
|                                     | White                          | 435 (64.5%)              | 116 (56.3%)                   | 319<br>(68.2%)                |         |
|                                     | Unknown                        | 149 (22.1%)              | 53 (25.7%)                    | 96 (20.5%)                    |         |
|                                     | Other                          | 14 (2.1%)                | 7 (3.4%)                      | 7 (1.4%)                      |         |
| <b>Smoking status, N<br/>(%)</b>    | Smoking data<br>available      | 593 (88.0%)              | 180 (87.4%)                   | 413<br>(88.2%)                | 0.96    |
|                                     | Current or former<br>smoker    | 472 (79.6%)              | 144 (80.0%)                   | 328<br>(79.4%)                |         |
| <b>Histology, N (%)</b>             | Adenocarcinoma                 | 290 (43.0%)              | 106 (43.0%)                   | 184<br>(51.5%)                | <0.001  |
|                                     | Transitional cell<br>carcinoma | 103 (15.3%)              | 27 (15.3%)                    | 76 (13.1%)                    |         |
|                                     | Squamous cell<br>carcinoma     | 157 (23.3%)              | 27 (23.3%)                    | 130<br>(13.1%)                |         |
|                                     | Other                          | 124 (18.4%)              | 46 (18.4%)                    | 78 (22.3%)                    |         |
| <b>Brain metastases,<br/>N (%)</b>  |                                | 124 (18.4%)              | 49 (23.8%)                    | 75 (16.0%)                    | 0.02    |
| <b>IO medication, N<br/>(%)</b>     | 1L                             | 537 (79.7%)              | 165 (80.1%)                   | 372<br>(79.5%)                | 0.94    |

|                                 |                  |             |             |             |        |
|---------------------------------|------------------|-------------|-------------|-------------|--------|
|                                 | Pembrolizumab    | 560 (83.1%) | 169 (82.0%) | 391 (83.5%) | 0.71   |
| <b>Practice Setting, N (%)</b>  | Number of sites  | 300         | 130         | 240         |        |
|                                 | AMCs             | 101 (33.7%) | 41 (31.5%)  | 81 (33.8%)  | 0.75   |
|                                 | Community Clinic | 199 (66.3%) | 89 (68.5%)  | 159 (66.8%) |        |
| <b>Biomarker testing, N (%)</b> | PD-L1 assessed   | 427 (63.4%) | 133 (64.6%) | 294 (62.8%) |        |
|                                 | PD-L1 Positive   | 293 (68.6%) | 89 (66.9%)  | 204 (69.4%) | 0.69   |
|                                 | PD-L1-Negative   | 134 (31.4%) | 44 (33.1%)  | 90 (30.6%)  |        |
|                                 | MSI-H            | 31 (4.6%)   | 18 (13.3%)  | 3 (0.7%)    | <0.001 |

\* Wilcoxon rank-sum test used. All other P Values were obtained using Pearson's chi-square test.

**eTable 9.** Patient Summary in the Evaluable Cohort by Cancer Type

(N = 674)

| NSCLC                          |                           | All Evaluable      | Evaluable TMB-H    | Evaluable TMB-L    |
|--------------------------------|---------------------------|--------------------|--------------------|--------------------|
| <b>Cohort Size</b>             | N                         | 330                | 101                | 229                |
| <b>Age at start of IO, yrs</b> | Median (range)            | 71.7, (28.6, 89.8) | 68.8, (33.8, 88.3) | 72.5, (28.6, 89.8) |
| <b>Sex, N (%)</b>              | Female                    | 169 (51.2%)        | 52 (51.5%)         | 117 (51.1%)        |
| <b>Race/Ethnicity, N (%)</b>   | Asian                     | 5 (1.5%)           | 2 (2.0%)           | 3 (1.3%)           |
|                                | Black or African American | 34 (10.3%)         | 14 (13.9%)         | 20 (8.7%)          |
|                                | Hispanic or Latino        | 6 (1.8%)           | 2 (2.0%)           | 4 (1.7%)           |
|                                | White                     | 225 (68.2%)        | 61 (60.4%)         | 164 (71.6%)        |
|                                | Unknown                   | 57 (17.3%)         | 21 (20.8%)         | 36 (15.7%)         |
|                                | Other                     | 3 (0.9%)           | 1 (1.0%)           | 2 (0.9%)           |
| <b>Smoking status, N (%)</b>   | Smoking data available    | 304 (92.1%)        | 94 (93.1%)         | 210 (91.7%)        |
|                                | Current or former smoker  | 288 (94.7%)        | 93 (98.9%)         | 195 (92.9%)        |
| <b>Brain metastases, N (%)</b> | Brain mets                | 97 (29.4%)         | 37 (36.6%)         | 60 (26.2%)         |
| <b>Histology, N (%)</b>        | Adenocarcinoma            | 235 (71.2%)        | 74 (73.2%)         | 161 (70.3%)        |
|                                | Squamous cell carcinoma   | 65 (19.7%)         | 15 (14.9%)         | 50 (21.8%)         |
|                                | Other                     | 30 (9.1%)          | 12 (11.9%)         | 18 (7.9%)          |
| <b>IO medication, N (%)</b>    | 1L                        | 330 (100.0%)       | 101 (100.0%)       | 229 (100.0%)       |
|                                | Pembrolizumab             | 295 (89.4%)        | 90 (89.1%)         | 205 (89.5%)        |
| <b>Practice Setting, N (%)</b> | Number of sites           | 173                | 75                 | 135                |
|                                | AMCs                      | 51 (29.5%)         | 20 (26.7%)         | 42 (31.1%)         |

|                                 |                             |                      |                        |                        |
|---------------------------------|-----------------------------|----------------------|------------------------|------------------------|
|                                 | Community Clinic            | 122 (70.5%)          | 55 (73.3%)             | 93 (68.9%)             |
| <b>Biomarker testing, N (%)</b> | PD-L1 assessed              | 224 (67.9%)          | 74 (73.3%)             | 150 (65.5%)            |
|                                 | PD-L1 Positive              | 196 (87.5%)          | 63 (85.1%)             | 133 (88.7%)            |
|                                 | PD-L1-Negative              | 28 (12.5%)           | 11 (14.9%)             | 17 (11.3%)             |
|                                 | MSI-H                       | 0 (0.0%)             | 0 (0.0%)               | 0 (0.0%)               |
| <b>Bladder</b>                  |                             | <b>All Evaluable</b> | <b>Evaluable TMB-H</b> | <b>Evaluable TMB-L</b> |
| <b>Cohort Size</b>              | N                           | 148                  | 38                     | 110                    |
| <b>Age at start of IO, yrs</b>  | Median (range)              | 69.2 (39.3, 89.7)    | 73.9 (48.0, 89.7)      | 68.5 (39.3, 87.6)      |
| <b>Sex, N (%)</b>               | Female                      | 34 (23.0%)           | 9 (23.7%)              | 25 (22.7%)             |
| <b>Race/Ethnicity, N (%)</b>    | Asian                       | 3 (2.0%)             | 2 (5.3%)               | 1 (0.9%)               |
|                                 | Black or African American   | 6 (4.1%)             | 2 (5.3%)               | 4 (3.6%)               |
|                                 | Hispanic or Latino          | 5 (3.4%)             | 4 (10.5%)              | 1 (0.9%)               |
|                                 | White                       | 96 (64.9%)           | 19 (50.0%)             | 77 (70.0%)             |
|                                 | Unknown                     | 35 (23.6%)           | 11 (28.9%)             | 24 (21.8%)             |
|                                 | Other                       | 3 (2.0%)             | 0                      | 3 (2.7%)               |
| <b>Smoking status, N (%)</b>    | Smoking data available      | 128 (86.5%)          | 33 (86.8%)             | 95 (86.4%)             |
|                                 | Current or former smoker    | 91 (71.1%)           | 22 (66.7%)             | 69 (72.6%)             |
| <b>Brain metastases, N (%)</b>  | Brain mets                  | 8 (5.4%)             | 3 (7.9%)               | 5 (4.5%)               |
| <b>Histology, N (%)</b>         | Transitional Cell Carcinoma | 103 (69.6%)          | 27 (71.0%)             | 76 (69.1%)             |
|                                 | Other                       | 40 (27.0%)           | 9 (23.7%)              | 31 (28.2%)             |
|                                 | Adenocarcinoma              | 3 (2.0%)             | 0                      | 3 (2.7%)               |

|                                 |                           |                      |                        |                        |
|---------------------------------|---------------------------|----------------------|------------------------|------------------------|
|                                 | Squamous cell carcinoma   | 2 (1.4%)             | 2 (5.3%)               | 0                      |
| <b>IO medication, N (%)</b>     | 1L                        | 89 (60.1%)           | 23 (60.5%)             | 66 (60.0%)             |
|                                 | Pembrolizumab             | 118 (79.7%)          | 31 (81.6%)             | 87 (79.1%)             |
| <b>Practice Setting, N (%)</b>  | Number of sites           | 91                   | 33                     | 71                     |
|                                 | AMCs                      | 35 (38.5%)           | 12 (36.4%)             | 27 (38.0%)             |
|                                 | Community Clinic          | 56 (61.5%)           | 21 (63.6%)             | 44 (62.0%)             |
| <b>Biomarker testing, N (%)</b> | PD-L1 assessed            | 91 (61.5%)           | 23 (60.5%)             | 68 (61.8%)             |
|                                 | PD-L1 Positive            | 46 (50.5%)           | 14 (60.9%)             | 32 (47.1%)             |
|                                 | PD-L1-Negative            | 45 (49.5%)           | 9 (39.1%)              | 36 (52.9%)             |
|                                 | MSI-H                     | 1 (0.7%)             | 1 (2.6%)               | 0 (0.0%)               |
| <b>HNSCC</b>                    |                           | <b>All Evaluable</b> | <b>Evaluable TMB-H</b> | <b>Evaluable TMB-L</b> |
| <b>Cohort Size</b>              | N                         | 96                   | 12                     | 84                     |
| <b>Age at start of IO, yrs</b>  | Median (range)            | 65.9 (35.8, 87.2)    | 69.2 (51.5, 75.9)      | 65.8 (35.8, 87.2)      |
| <b>Sex, N (%)</b>               | Female                    | 24 (25.0%)           | 4 (33.3%)              | 20 (23.8%)             |
| <b>Race/Ethnicity, N (%)</b>    | Asian                     | 2 (20.1%)            | 0                      | 2 (2.4%)               |
|                                 | Black or African American | 3 (3.1%)             | 2 (16.7%)              | 1 (1.2%)               |
|                                 | White                     | 62 (64.6%)           | 6 (50.0%)              | 56 (66.7%)             |
|                                 | Unknown                   | 27 (28.1%)           | 3 (25.0%)              | 24 (28.6%)             |
|                                 | Other                     | 2 (2.1%)             | 1 (8.3%)               | 1 (1.2%)               |
| <b>Smoking status, N (%)</b>    | Smoking data available    | 81 (84.4%)           | 8 (66.7%)              | 73 (86.9%)             |
|                                 | Current or former smoker  | 56 (69.1%)           | 7 (87.5%)              | 49 (67.1%)             |
| <b>Brain metastases, N (%)</b>  | Brain mets                | 4 (4.2%)             | 1 (8.3%)               | 3 (3.6%)               |

|                                 |                         |                      |                        |                        |
|---------------------------------|-------------------------|----------------------|------------------------|------------------------|
| <b>Histology, N (%)</b>         | Squamous cell carcinoma | 90 (93.7%)           | 10 (83.3%)             | 80 (95.2%)             |
|                                 | Other                   | 4 (4.2%)             | 1 (8.3%)               | 3 (3.6%)               |
|                                 | Adenocarcinoma          | 2 (2.1%)             | 1 (8.3%)               | 1 (1.2%)               |
| <b>IO medication, N (%)</b>     | 1L                      | 51 (53.1%)           | 3 (25.0%)              | 48 (57.1%)             |
|                                 | Pembrolizumab           | 87 (90.6%)           | 10 (83.3%)             | 77 (91.7%)             |
| <b>Practice Setting, N (%)</b>  | Number of sites         | 81                   | 12                     | 73                     |
|                                 | AMCs                    | 34 (42.0%)           | 6 (50.0%)              | 31 (42.5%)             |
|                                 | Community Clinic        | 47 (58.0%)           | 6 (50.0%)              | 42 (57.5%)             |
| <b>Biomarker testing, N (%)</b> | PD-L1 assessed          | 58 (60.4%)           | 10 (83.3%)             | 48 (57.1%)             |
|                                 | PD-L1 Positive          | 35 (60.3%)           | 5 (50.0%)              | 30 (62.5%)             |
|                                 | PD-L1-Negative          | 23 (39.7%)           | 5 (50.0%)              | 18 (37.5%)             |
|                                 | MSI-H                   | 1 (1.0%)             | 0 (0.0%)               | 1 (1.2%)               |
| <b>Melanoma</b>                 |                         | <b>All Evaluable</b> | <b>Evaluable TMB-H</b> | <b>Evaluable TMB-L</b> |
| <b>Cohort Size</b>              | N                       | 48                   | 23                     | 25                     |
| <b>Age at start of IO (yrs)</b> | Median (range)          | 63.2, (34.0, 89.3)   | 67.2, (34.8, 89.3)     | 61.5, (34.0, 85.3)     |
| <b>Sex, N (%)</b>               | Female                  | 20 (41.7%)           | 5 (21.7%)              | 15 (60.0%)             |
| <b>Race/Ethnicity, N (%)</b>    | Asian                   | 1 (2.1%)             | 0                      | 1 (4.0%)               |
|                                 | Hispanic or Latino      | 1 (2.1%)             | 0                      | 1 (4.0%)               |
|                                 | White                   | 25 (52.1%)           | 14 (60.9%)             | 11 (44.0%)             |
|                                 | Unknown                 | 16 (33.3%)           | 7 (30.4%)              | 9 (36.0%)              |
|                                 | Other                   | 5 (10.4%)            | 2 (8.7%)               | 3 (12.0%)              |
|                                 | Smoking data available  | 40 (83.3%)           | 19 (82.6%)             | 21 (84.0%)             |

|                                 |                           |                      |                        |                        |
|---------------------------------|---------------------------|----------------------|------------------------|------------------------|
| <b>Smoking status, N (%)</b>    | Current or former smoker  | 16 (40.0%)           | 8 (42.1%)              | 8 (38.1%)              |
| <b>Brain metastases, N (%)</b>  | Brain mets                | 11 (22.9%)           | 6 (26.1%)              | 5 (20.0%)              |
| <b>Histology, N (%)</b>         | Other                     | 48 (100.0%)          | 23 (100.0%)            | 25 (100.0%)            |
| <b>IO medication, N (%)</b>     | 1L                        | 48 (100.0%)          | 23 (100.0%)            | 25 (100.0%)            |
|                                 | Pembrolizumab             | 14 (29.2%)           | 10 (43.5%)             | 4 (16.0%)              |
| <b>Practice Setting, N (%)</b>  | Number of sites           | 33                   | 17                     | 18                     |
|                                 | AMCs                      | 8 (24.2%)            | 5 (29.4%)              | 4 (22.2%)              |
|                                 | Community Clinic          | 25 (75.8%)           | 12 (70.6%)             | 14 (77.8%)             |
| <b>Biomarker testing, N (%)</b> | PD-L1 assessed            | 20 (41.7%)           | 8 (34.8%)              | 12 (48.0%)             |
|                                 | PD-L1 Positive            | 10 (50.0%)           | 4 (50.0%)              | 6 (50.0%)              |
|                                 | PD-L1-Negative            | 10 (50.0%)           | 4 (50.0%)              | 6 (50.0%)              |
|                                 | MSI-H                     | 1 (2.1%)             | 1 (4.3%)               | 0 (0.0%)               |
| <b>CRC</b>                      |                           | <b>All Evaluable</b> | <b>Evaluable TMB-H</b> | <b>Evaluable TMB-L</b> |
| <b>Cohort Size</b>              | N                         | 39                   | 27                     | 12                     |
| <b>Age at start of IO (yrs)</b> | Median (range)            | 63.1 (29.0, 88.1)    | 65.4 (29.0, 87.8)      | 60.6 (36.7, 88.1)      |
| <b>Sex, N (%)</b>               | Female                    | 16 (41.0%)           | 10 (37.0%)             | 6 (50.0%)              |
| <b>Race/Ethnicity, N (%)</b>    | Asian                     | 3 (7.7%)             | 1 (3.7%)               | 2 (16.7%)              |
|                                 | Black or African American | 2 (5.1%)             | 1 (3.7%)               | 1 (8.3%)               |
|                                 | Hispanic or Latino        | 1 (2.6%)             | 1 (3.7%)               | 0                      |
|                                 | White                     | 22 (56.4%)           | 14 (51.9%)             | 8 (66.7%)              |
|                                 | Unknown                   | 10 (25.6%)           | 9 (33.3%)              | 1 (8.3%)               |
|                                 | Other                     | 1 (2.6%)             | 1 (3.7%)               | 0                      |

|                                 |                          |                      |                        |                        |
|---------------------------------|--------------------------|----------------------|------------------------|------------------------|
| <b>Smoking status, N (%)</b>    | Smoking data available   | 30 (76.9%)           | 22 (81.5%)             | 8 (66.7%)              |
|                                 | Current or former smoker | 16 (53.3%)           | 12 (54.5%)             | 4 (50.0%)              |
| <b>Brain metastases, N (%)</b>  | Brain mets               | 2 (5.1%)             | 1 (3.7%)               | 1 (8.3%)               |
| <b>Histology, N (%)</b>         | Adenocarcinoma           | 39 (100.0%)          | 27 (100.0%)            | 12 (100.0%)            |
| <b>IO medication, N (%)</b>     | 1L                       | 19 (48.7%)           | 15 (55.6%)             | 4 (33.3%)              |
|                                 | Pembrolizumab            | 33 (84.6%)           | 23 (85.2%)             | 10 (83.3%)             |
| <b>Practice Setting, N (%)</b>  | Number of sites          | 35                   | 25                     | 12                     |
|                                 | AMCs                     | 11 (31.4%)           | 9 (36.0%)              | 4 (33.3%)              |
|                                 | Community Clinic         | 24 (68.6%)           | 16 (64.0%)             | 8 (66.7%)              |
| <b>Biomarker testing, N (%)</b> | PD-L1 assessed           | 23 (59.0%)           | 15 (55.6%)             | 8 (66.7%)              |
|                                 | PD-L1 Positive           | 5 (21.7%)            | 3 (20.0%)              | 2 (25.0%)              |
|                                 | PD-L1-Negative           | 18 (78.3%)           | 12 (80.0%)             | 6 (75.0%)              |
|                                 | MSI-H                    | 24 (61.5%)           | 23 (85.2%)             | 1 (8.3%)               |
| <b>Gastric</b>                  |                          | <b>All Evaluable</b> | <b>Evaluable TMB-H</b> | <b>Evaluable TMB-L</b> |
| <b>Cohort Size</b>              | N                        | 7                    | 1                      | 6                      |
| <b>Age at start of IO, yrs</b>  | Median (range)           | 66.4 (50.8, 70.9)    | 70.9 (70.9, 70.9)      | 66.2 (50.8, 70.2)      |
| <b>Sex, N (%)</b>               | Female                   | 2 (28.6%)            | 0 (0.0%)               | 2 (33.3%)              |
| <b>Race/Ethnicity, N (%)</b>    | Hispanic or Latino       | 2 (28.6%)            | 0                      | 2 (33.3%)              |
|                                 | White                    | 3 (42.9%)            | 1 (100.0%)             | 2 (33.3%)              |
|                                 | Unknown                  | 2 (28.6%)            | 0                      | 2 (33.3%)              |
| <b>Smoking status, N (%)</b>    | Smoking data available   | 5 (71.4%)            | 1 (100.0%)             | 4 (66.7%)              |
|                                 | Current or former smoker | 3 (60.0%)            | 1 (100.0%)             | 2 (50.0%)              |



|                                 |                  |            |            |            |
|---------------------------------|------------------|------------|------------|------------|
| <b>Brain metastases, N (%)</b>  | Brain mets       | 1 (14.3%)  | 0 (0.0%)   | 1 (16.7%)  |
| <b>Histology, N (%)</b>         | Other            | 1 (14.3%)  | 0          | 1 (16.7%)  |
|                                 | Adenocarcinoma   | 6 (85.7%)  | 1 (100.0%) | 5 (83.3%)  |
| <b>IO medication, N (%)</b>     | 1L               | 0 (0.0%)   | 0 (0.0%)   | 0 (0.0%)   |
|                                 | Pembrolizumab    | 7 (100.0%) | 1 (100.0%) | 6 (100.0%) |
| <b>Practice Setting, N (%)</b>  | Number of sites  | 7          | 1          | 6          |
|                                 | AMCs             | 5 (71.4%)  | 0 (0.0%)   | 5 (83.3%)  |
|                                 | Community Clinic | 2 (28.6%)  | 1 (100.0%) | 1 (16.7%)  |
| <b>Biomarker testing, N (%)</b> | PD-L1 assessed   | 7 (100.0%) | 1 (100.0%) | 6 (100.0%) |
|                                 | PD-L1 Positive   | 1 (14.3%)  | 0 (0.0%)   | 1 (16.7%)  |
|                                 | PD-L1-Negative   | 6 (85.7%)  | 1 (100.0%) | 5 (83.3%)  |
|                                 | MSI-H            | 0 (0.0%)   | 0 (0.0%)   | 0 (0.0%)   |

**eTable 10.** Patient Summary in the Prospective Cohort by Cancer Type

(N = 403)

| NSCLC                          |                           | All Prospective   | Prospective TMB-H | Prospective TMB-L |
|--------------------------------|---------------------------|-------------------|-------------------|-------------------|
| <b>Cohort Size</b>             | N                         | 242               | 79                | 163               |
| <b>Age at start of IO, yrs</b> | Median (range)            | 72.4 (43.7, 89.8) | 68.8 (51.4, 88.3) | 74.4 (43.7, 89.8) |
| <b>Sex, N (%)</b>              | Female                    | 129 (53.3%)       | 42 (53.2%)        | 87 (53.4%)        |
| <b>Race/Ethnicity, N (%)</b>   | Asian                     | 4 (1.7%)          | 2 (2.5%)          | 2 (1.2%)          |
|                                | Black or African American | 26 (10.7%)        | 11 (13.9%)        | 15 (9.2%)         |
|                                | Hispanic or Latino        | 6 (2.5%)          | 2 (2.5%)          | 4 (2.5%)          |
|                                | White                     | 168 (69.4%)       | 52 (65.8%)        | 116 (71.2%)       |
|                                | Unknown                   | 35 (14.5%)        | 11 (13.9%)        | 24 (14.7%)        |
|                                | Other                     | 3 (1.2%)          | 1 (1.3%)          | 2 (1.2%)          |
| <b>Smoking status, N (%)</b>   | Smoking data available    | 232 (95.9%)       | 75 (94.9%)        | 157 (96.3%)       |
|                                | Current or former smoker  | 223 (96.1%)       | 74 (98.7%)        | 149 (94.9%)       |
| <b>Brain metastases, N (%)</b> | Brain mets                | 75 (31.0%)        | 31 (39.2%)        | 44 (27.0%)        |
| <b>Histology, N (%)</b>        | Adenocarcinoma            | 178 (73.6%)       | 62 (78.5%)        | 116 (71.2%)       |
|                                | Squamous cell carcinoma   | 41 (16.9%)        | 9 (11.4%)         | 32 (19.6%)        |
|                                | Other                     | 23 (9.5%)         | 8 (10.1%)         | 15 (9.2%)         |
|                                | 1L                        | 242 (100.0%)      | 79 (100.0%)       | 163 (100.0%)      |

|                                 |                           |                        |                          |                          |
|---------------------------------|---------------------------|------------------------|--------------------------|--------------------------|
| <b>IO medication, N (%)</b>     | Pembrolizumab             | 212 (87.6%)            | 69 (87.3%)               | 143 (87.7%)              |
|                                 | Number of sites           | 127                    | 58                       | 96                       |
| <b>Practice Setting, N (%)</b>  | AMCs                      | 29 (22.8%)             | 10 (17.2%)               | 25 (26.0%)               |
|                                 | Community Clinic          | 98 (77.2%)             | 48 (82.8%)               | 71 (74.0%)               |
| <b>Biomarker testing, N (%)</b> | PD-L1 assessed            | 189 (78.1%)            | 65 (82.3%)               | 124 (76.1%)              |
|                                 | PD-L1 Positive            | 164 (86.8%)            | 54 (83.1%)               | 110 (88.7%)              |
|                                 | PD-L1-Negative            | 25 (13.2%)             | 11 (16.9%)               | 14 (11.3%)               |
|                                 | MSI-H                     | 0 (0.0%)               | 0 (0.0%)                 | 0 (0.0%)                 |
| <b>Bladder</b>                  |                           | <b>All Prospective</b> | <b>Prospective TMB-H</b> | <b>Prospective TMB-L</b> |
| <b>Cohort Size</b>              | N                         | 77                     | 22                       | 55                       |
| <b>Age at start of IO, yrs</b>  | Median (range)            | 68.6 (43.8, 89.7)      | 74.3 (48.0, 89.7)        | 67.1 (43.8, 87.6)        |
| <b>Sex, N (%)</b>               | Female                    | 15 (19.5%)             | 4 (18.2%)                | 11 (20.0%)               |
| <b>Race/Ethnicity, N (%)</b>    | Asian                     | 2 (2.6%)               | 0                        | 2 (3.6%)                 |
|                                 | Black or African American | 2 (2.6%)               | 0                        | 2 (3.6%)                 |
|                                 | Hispanic or Latino        | 4 (5.2%)               | 3 (13.6%)                | 1 (1.8%)                 |
|                                 | White                     | 48 (62.3%)             | 11 (50.0%)               | 37 (67.3%)               |
|                                 | Unknown                   | 18 (23.4%)             | 6 (27.3%)                | 12 (21.8%)               |
|                                 | Other                     | 3 (3.9%)               | 2 (9.1%)                 | 1 (1.8%)                 |
|                                 | Smoking data available    | 67 (87.0%)             | 19 (86.4%)               | 48 (87.3%)               |

|                                 |                             |                        |                          |                          |
|---------------------------------|-----------------------------|------------------------|--------------------------|--------------------------|
| <b>Smoking status, N (%)</b>    | Current or former smoker    | 49 (73.1%)             | 11 (57.9%)               | 38 (79.2%)               |
| <b>Brain metastases, N (%)</b>  | Brain mets                  | 5 (6.5%)               | 1 (4.5%)                 | 4 (7.3%)                 |
| <b>Histology, N (%)</b>         | Transitional Cell Carcinoma | 56 (72.7%)             | 17 (77.3%)               | 39 (70.9%)               |
|                                 | Other                       | 19 (24.7%)             | 5 (22.7%)                | 14 (25.5%)               |
|                                 | Adenocarcinoma              | 2 (2.6%)               | 0                        | 2 (3.6%)                 |
| <b>IO medication, N (%)</b>     | 1L                          | 41 (53.2%)             | 13 (59.1%)               | 28 (50.9%)               |
|                                 | Pembrolizumab               | 61 (79.2%)             | 17 (77.3%)               | 44 (80.0%)               |
| <b>Practice Setting, N (%)</b>  | Number of sites             | 52                     | 21                       | 40                       |
|                                 | AMCs                        | 17 (32.7%)             | 8 (38.1%)                | 13 (32.5%)               |
|                                 | Community Clinic            | 35 (67.3%)             | 13 (61.9%)               | 27 (67.5%)               |
| <b>Biomarker testing, N (%)</b> | PD-L1 assessed              | 50 (64.9%)             | 15 (68.2%)               | 35 (63.6%)               |
|                                 | PD-L1 Positive              | 29 (58.0%)             | 8 (53.3%)                | 21 (60.0%)               |
|                                 | PD-L1-Negative              | 21 (42.0%)             | 7 (46.7%)                | 14 (40.0%)               |
|                                 | MSI-H                       | 0 (0.0%)               | 0 (0.0%)                 | 0 (0.0%)                 |
| <b>HNSCC</b>                    |                             | <b>All Prospective</b> | <b>Prospective TMB-H</b> | <b>Prospective TMB-L</b> |
| <b>Cohort Size</b>              | N                           | 43                     | 8                        | 35                       |
| <b>Age at start of IO (yrs)</b> | Median (range)              | 68.7 (46.1, 87.2)      | 69.2 (51.5, 75.9)        | 68.6 (46.1, 87.2)        |
| <b>Sex, N (%)</b>               | Female                      | 13 (30.2%)             | 3 (37.5%)                | 10 (28.6%)               |

|                                   |                          |                        |                          |                          |
|-----------------------------------|--------------------------|------------------------|--------------------------|--------------------------|
| <b>Race/<br/>Ethnicity, N (%)</b> | Asian                    | 2 (4.7%)               | 0                        | 2 (5.7%)                 |
|                                   | White                    | 30 (69.8%)             | 5 (62.5%)                | 25 (71.4%)               |
|                                   | Unknown                  | 9 (20.9%)              | 2 (25.0%)                | 7 (20.0%)                |
|                                   | Other                    | 2 (4.7%)               | 1 (12.5%)                | 1 (2.9%)                 |
| <b>Smoking status, N (%)</b>      | Smoking data available   | 37 (86.0%)             | 6 (75.0%)                | 31 (88.6%)               |
|                                   | Current or former smoker | 25 (67.6%)             | 5 (83.3%)                | 20 (64.5%)               |
| <b>Brain metastases, N (%)</b>    | Brain mets               | 2 (4.7%)               | 1 (12.5%)                | 1 (2.9%)                 |
| <b>Histology, N (%)</b>           | Squamous cell carcinoma  | 39 (90.7%)             | 7 (87.5%)                | 32 (91.4%)               |
|                                   | Adenocarcinoma           | 2 (4.7%)               | 1 (12.5%)                | 1 (2.9%)                 |
|                                   | Other                    | 2 (4.7%)               | 0                        | 2 (5.7%)                 |
| <b>IO medication, N (%)</b>       | 1L                       | 26 (60.5%)             | 2 (25.0%)                | 24 (68.6%)               |
|                                   | Pembrolizumab            | 40 (93.0%)             | 7 (87.5%)                | 33 (94.3%)               |
| <b>Practice Setting, N (%)</b>    | Number of sites          | 38                     | 8                        | 32                       |
|                                   | AMCs                     | 16 (42.1%)             | 6 (75.0%)                | 12 (37.5%)               |
|                                   | Community Clinic         | 22 (57.9%)             | 2 (25.0%)                | 20 (62.5%)               |
| <b>Biomarker testing, N (%)</b>   | PD-L1 assessed           | 35 (81.4%)             | 6 (75.0%)                | 29 (82.9%)               |
|                                   | PD-L1 Positive           | 22 (62.9%)             | 4 (66.7%)                | 18 (62.1%)               |
|                                   | PD-L1-Negative           | 13 (37.1%)             | 2 (33.3%)                | 11 (37.9%)               |
|                                   | MSI-H                    | 1 (2.3%)               | 0 (0.0%)                 | 1 (2.9%)                 |
| <b>Melanoma</b>                   |                          | <b>All Prospective</b> | <b>Prospective TMB-H</b> | <b>Prospective TMB-L</b> |

|                                 |                          |                   |                   |                   |
|---------------------------------|--------------------------|-------------------|-------------------|-------------------|
| <b>Cohort Size</b>              | N                        | 14                | 7                 | 7                 |
| <b>Age at start of IO, yrs</b>  | Median (range)           | 60.2 (34.0, 89.3) | 60.6 (34.8, 89.3) | 59.8 (34.0, 76.3) |
| <b>Sex, N (%)</b>               | Female                   | 7 (50.0%)         | 3 (42.9%)         | 4 (57.1%)         |
| <b>Race/Ethnicity, N (%)</b>    | Asian                    | 1 (7.1%)          | 0                 | 1 (14.3%)         |
|                                 | White                    | 8 (57.1%)         | 4 (57.1%)         | 4 (57.1%)         |
|                                 | Unknown                  | 3 (21.4%)         | 2 (28.6%)         | 1 (14.3%)         |
|                                 | Other                    | 2 (14.3%)         | 1 (14.3%)         | 1 (14.3%)         |
| <b>Smoking status, N (%)</b>    | Smoking data available   | 12 (85.7%)        | 7 (100.0%)        | 5 (71.4%)         |
|                                 | Current or former smoker | 4 (33.3%)         | 3 (42.9%)         | 1 (20.0%)         |
| <b>Brain metastases, N (%)</b>  | Brain mets               | 4 (28.6%)         | 3 (42.9%)         | 1 (14.3%)         |
| <b>Histology, N (%)</b>         | Other                    | 14 (100.0%)       | 7 (100.0%)        | 7 (100.0%)        |
| <b>IO medication, N (%)</b>     | 1L                       | 14 (100.0%)       | 7 (100.0%)        | 7 (100.0%)        |
|                                 | Pembrolizumab            | 3 (21.4%)         | 3 (42.9%)         | 0 (0.0%)          |
| <b>Practice Setting, N (%)</b>  | Number of sites          | 8                 | 5                 | 4                 |
|                                 | AMCs                     | 1 (12.5%)         | 1 (20.0%)         | 1 (25.0%)         |
|                                 | Community Clinic         | 7 (87.5%)         | 4 (80.0%)         | 3 (75.0%)         |
| <b>Biomarker testing, N (%)</b> | PD-L1 assessed           | 5 (35.7%)         | 3 (42.9%)         | 2 (28.6%)         |
|                                 | PD-L1 Positive           | 3 (60.0%)         | 2 (66.7%)         | 1 (50.0%)         |
|                                 | PD-L1-Negative           | 2 (40.0%)         | 1 (33.3%)         | 1 (50.0%)         |
|                                 | MSI-H                    | 1 (7.1%)          | 1 (14.3%)         | 0 (0.0%)          |

| CRC                             |                           | All Prospective   | Prospective TMB-H | Prospective TMB-L |
|---------------------------------|---------------------------|-------------------|-------------------|-------------------|
| <b>Cohort Size</b>              | N                         | 23                | 17                | 6                 |
| <b>Age at start of IO (yrs)</b> | Median (range)            | 73.1 (38.3, 88.1) | 74.0 (38.3, 87.8) | 57.4 (48.2, 88.1) |
| <b>Sex, N (%)</b>               | Female                    | 12 (52.2%)        | 7 (41.2%)         | 5 (83.3%)         |
| <b>Race/Ethnicity, N</b>        | Asian                     | 2 (8.7%)          | 1 (5.9%)          | 1 (16.7%)         |
|                                 | Black or African American | 2 (8.7%)          | 1 (5.9%)          | 1 (16.7%)         |
|                                 | White                     | 13 (56.5%)        | 10 (58.8%)        | 3 (50.0%)         |
|                                 | Unknown                   | 6 (26.1%)         | 5 (29.4%)         | 1 (16.7%)         |
| <b>Smoking status, N (%)</b>    | Smoking data available    | 21 (91.3%)        | 16 (94.1%)        | 5 (83.0%)         |
|                                 | Current or former smoker  | 12 (52.7%)        | 10 (62.5%)        | 2 (40.0%)         |
| <b>Brain metastases, N (%)</b>  | Brain mets                | 0 (0.0%)          | 0 (0.0%)          | 0 (0.0%)          |
| <b>Histology, N</b>             | Adenocarcinoma            | 23 (100.0%)       | 17 (100.0%)       | 6 (100.0%)        |
| <b>IO medication, N (%)</b>     | 1L                        | 13 (56.5%)        | 11 (64.7%)        | 2 (33.3%)         |
|                                 | Pembrolizumab             | 19 (82.6%)        | 13 (76.5%)        | 6 (100.0%)        |
|                                 | Number of sites           | 20                | 16                | 6                 |
| <b>Practice Setting, N (%)</b>  | AMCs                      | 6 (30.0%)         | 5 (31.2%)         | 3 (50.0%)         |
|                                 | Community Clinic          | 14 (70.0%)        | 11 (68.8%)        | 3 (50.0%)         |
| <b>Biomarker testing, N (%)</b> | PD-L1 assessed            | 13 (56.5%)        | 10 (58.8%)        | 3 (50.0%)         |
|                                 | PD-L1 Positive            | 3 (23.1%)         | 2 (20.0%)         | 1 (33.3%)         |
|                                 | PD-L1-Negative            | 10 (76.9%)        | 8 (80.0%)         | 2 (66.7%)         |

|  |       |            |            |           |
|--|-------|------------|------------|-----------|
|  | MSI-H | 16 (69.6%) | 15 (88.2%) | 1 (16.7%) |
|--|-------|------------|------------|-----------|



**eTable 11.** Univariate Cox-Proportional Hazards Models

| Cohort                                | coxPH formula          | HR    | Upper_CI | P Value |
|---------------------------------------|------------------------|-------|----------|---------|
| Prospective NSCLC                     | OS ~ TMB               | 0.67  | 1.00     | 0.05    |
| Prospective Pembrolizumab treated     | OS ~ TMB + strata(LoT) | 0.67  | 0.94     | 0.03    |
| Prospective non-Pembrolizumab treated | OS ~ TMB + strata(LoT) | 0.37  | 0.85     | 0.03    |
| Prospective NSCLC                     | OS ~ PD-L1             | 0.55* | 0.96     | 0.04    |

\*HR is for PD-L1 > 50% vs. PD-L1 < 1%. The HR for PD-L1 1-49% vs. PD-L1 < 1% was 0.55 (P=0.064). The HR for PD-L1 unknown vs. PD-L1 < 1% was 0.44 (P=0.016).

**eTable 12.** Multivariable Cox-Proportional Hazards Models

| Cohort            | Survival Formula                                                                                               | Variable                    | HR   | One-sided UCB | P Value |
|-------------------|----------------------------------------------------------------------------------------------------------------|-----------------------------|------|---------------|---------|
| Prospective       | OS ~ TMB + PD-L1 classification (posi. vs. neg vs. unknown) + MSI classification (MSI-H vs. MSS) + strata(LoT) | TMB high vs low             | 0.67 | 0.92          | 0.02    |
|                   |                                                                                                                | PDL1 Pos. vs Neg            | 1.03 |               |         |
|                   |                                                                                                                | PDL1 Unknown vs. Neg        | 0.92 |               |         |
|                   |                                                                                                                | MSI-H Vs MSS                | 0.46 |               |         |
| Prospective NSCLC | OS ~ TMB + PD-L1 classification (positive vs. neg vs. unknown)                                                 | TMB high Vs low             | 0.65 | 0.97          | 0.04    |
|                   |                                                                                                                | PD-L1 >50% vs PD-L1 < 1%    | 0.52 |               |         |
|                   |                                                                                                                | PD-L1 1-49% vs PD-L1 < 1%   | 0.54 |               |         |
|                   |                                                                                                                | PD-L1 Unknown vs PD-L1 < 1% | 0.42 |               |         |

## Figure Legends

### eFigure 1. Kaplan-Meier (KM) Analysis of OS by TMB Status in the Evaluable Cohort in First-Line and Second-Line Treated Patients

(a) KM plot of OS in the evaluable cohort treated with IO at 1L. (b) KM plot of OS in the evaluable cohort treated with IO at 2L.

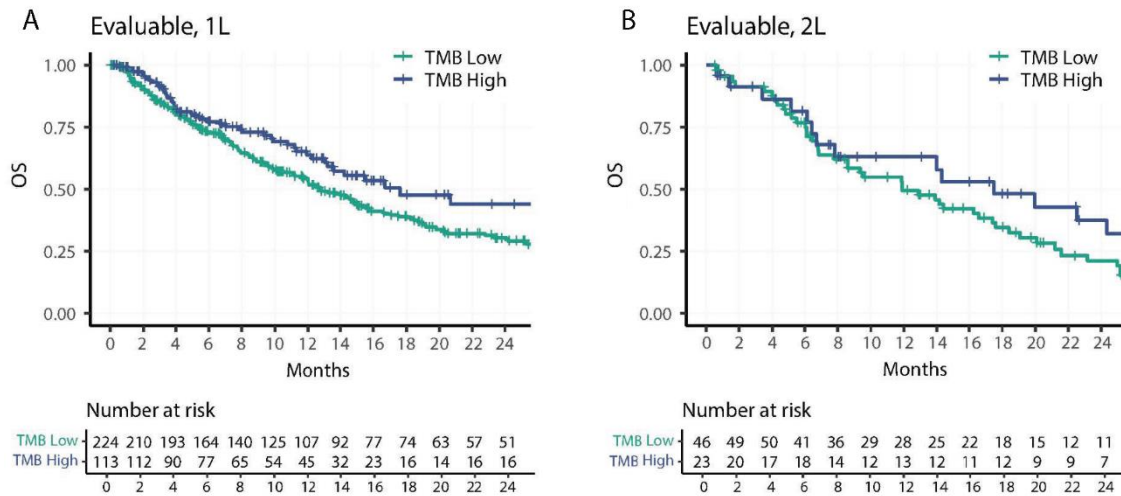

**eFigure 2. Kaplan-Meier (KM) Analysis of Clinical Outcomes by TMB Status in the Prospective Cohort in First-Line and Second-Line Treated Patients**

(a) OS in the prospective cohort treated with IO at 1L. (b) OS in the prospective cohort treated with IO at 2L. (c) PFS in the prospective cohort treated with IO at 1L. (d) PFS in the prospective cohort treated with IO at 2L. (e) TTP in the prospective cohort treated with IO at 1L. (f) TTP in the prospective cohort treated with IO at 2L.

**A**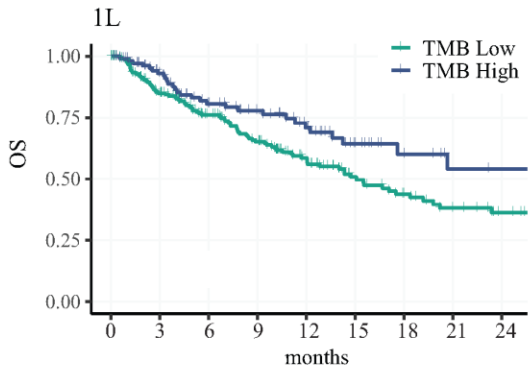

Number at risk

|          |     |     |     |     |    |    |    |    |    |
|----------|-----|-----|-----|-----|----|----|----|----|----|
| TMB Low  | 224 | 165 | 127 | 100 | 69 | 45 | 34 | 25 | 17 |
| TMB High | 112 | 88  | 64  | 50  | 38 | 22 | 14 | 9  | 8  |
|          | 0   | 3   | 6   | 9   | 12 | 15 | 18 | 21 | 24 |

**B**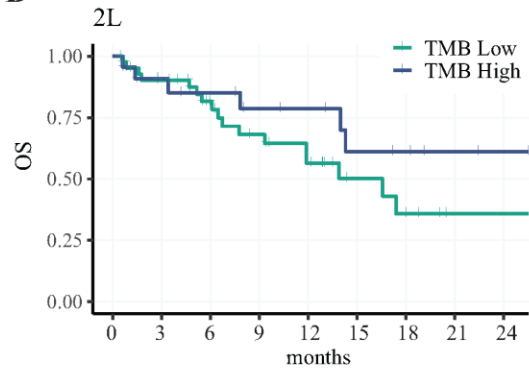

Number at risk

|          |    |    |    |    |    |    |    |    |    |
|----------|----|----|----|----|----|----|----|----|----|
| TMB Low  | 44 | 35 | 25 | 19 | 14 | 7  | 5  | 1  | 1  |
| TMB High | 23 | 16 | 14 | 11 | 10 | 7  | 6  | 4  | 3  |
|          | 0  | 3  | 6  | 9  | 12 | 15 | 18 | 21 | 24 |

**C**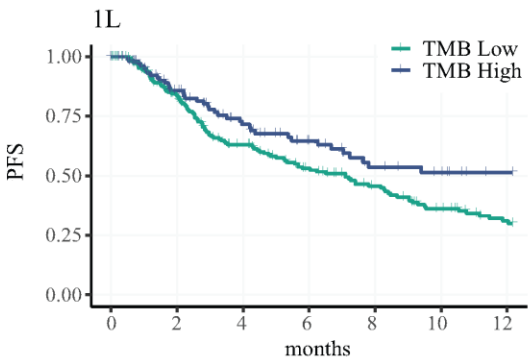

Number at risk

|          |     |     |     |    |    |    |    |
|----------|-----|-----|-----|----|----|----|----|
| TMB Low  | 224 | 159 | 106 | 79 | 59 | 42 | 29 |
| TMB High | 112 | 80  | 55  | 41 | 26 | 22 | 16 |
|          | 0   | 2   | 4   | 6  | 8  | 10 | 12 |

**D**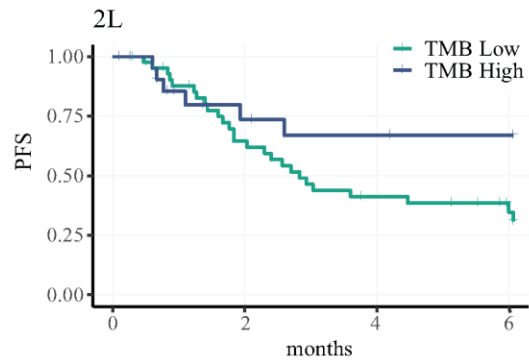

Number at risk

|          |    |    |    |    |
|----------|----|----|----|----|
| TMB Low  | 44 | 25 | 15 | 10 |
| TMB High | 23 | 12 | 10 | 9  |
|          | 0  | 2  | 4  | 6  |

**E**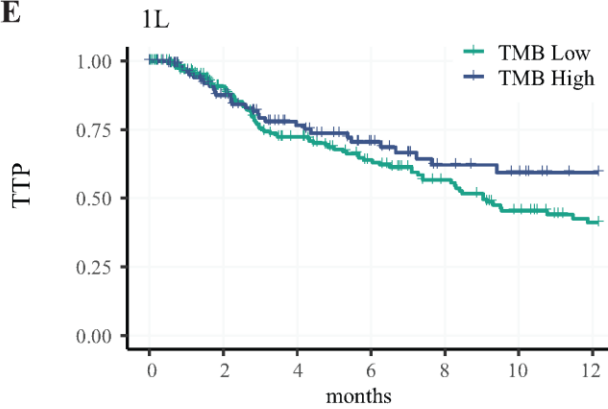

Number at risk

|          |     |     |     |    |    |    |    |
|----------|-----|-----|-----|----|----|----|----|
| TMB Low  | 224 | 150 | 102 | 77 | 57 | 41 | 28 |
| TMB High | 112 | 79  | 54  | 40 | 25 | 21 | 15 |
|          | 0   | 2   | 4   | 6  | 8  | 10 | 12 |

**F**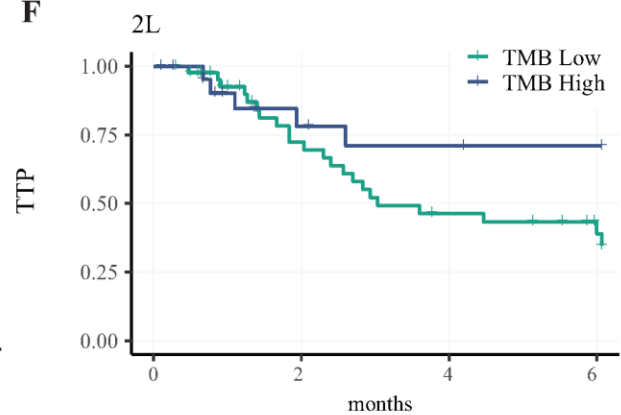

Number at risk

|          |    |    |    |    |
|----------|----|----|----|----|
| TMB Low  | 44 | 25 | 15 | 10 |
| TMB High | 23 | 12 | 10 | 9  |
|          | 0  | 2  | 4  | 6  |

**eFigure 3. Assessment of Overall Survival by TMB-Status in Each Cancer Indication in the Evaluable Cohort**

1-year survival probability in each cancer type by TMB status estimated from KM analysis in the evaluable cohort.

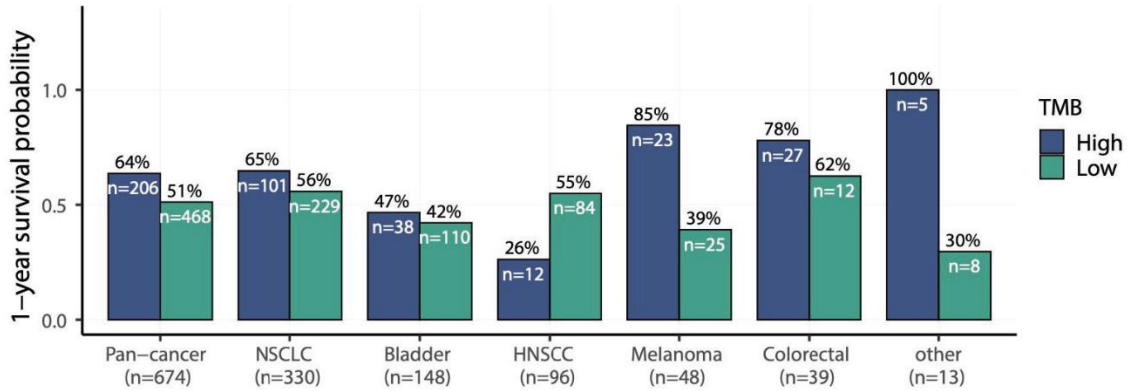

**eFigure 4. Kaplan-Meier (KM) Analysis of Clinical Outcomes by TMB Status in the Prospective Cohort in Pembrolizumab and Non-pembrolizumab Treated Patients**

(a) KM analysis of OS by TMB status in pembrolizumab treated patients. (b) KM analysis of OS by TMB status in non-pembrolizumab ICI treated patients.

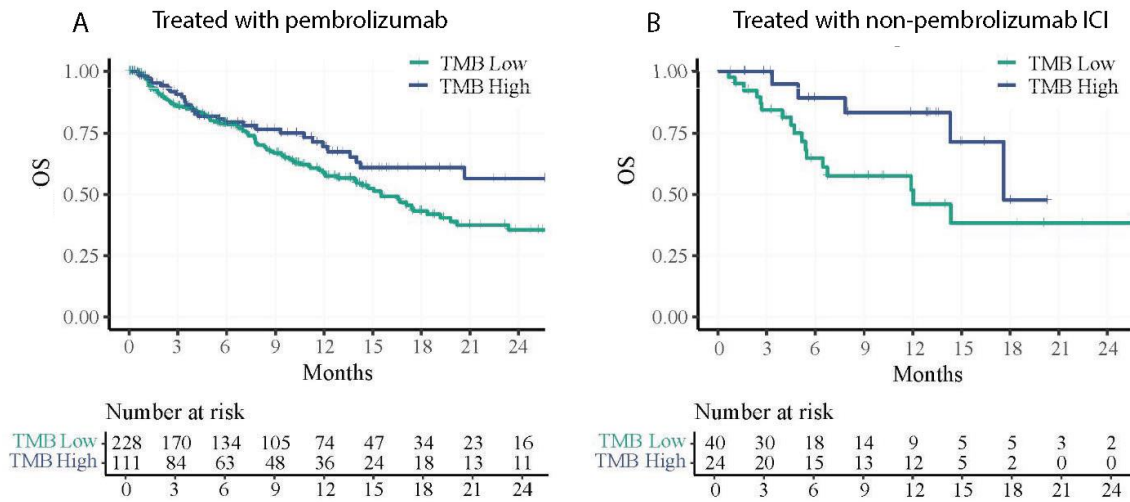

Supplement: jamanetwopen-e2311181-s001.pdf [file jamanetwopen-e2311181-s001.pdf]
