# Supplementary material for: Assessment of Tumor Mutational Burden and Outcomes in Patients With Diverse Advanced Cancers Treated With Immunotherapy
Source: PubMed Central journal article supplement — JAMA Netw Open. 2023 May 2;6(5):e2311181. doi: 10.1001/jamanetworkopen.2023.11181 (PMC10155064; doi:10.1001/jamanetworkopen.2023.11181), 2023-05-02
Supplement: jamanetwopen-e2311181-s002.pdf [file jamanetwopen-e2311181-s002.pdf]

## Data Sharing Statement

Aggarwal. Assessment of Tumor Mutational Burden and Outcomes in Patients With Diverse Advanced Cancers Treated With Immunotherapy. *JAMA Netw Open*. Published May 02, 2023. doi:10.1001/jamanetworkopen.2023.11181

### Data

**Data available:** Yes

**Data types:** Deidentified participant data

**How to access data:** Please email [publications@tempus.com](mailto:publications@tempus.com)

**When available:** With publication

### Supporting Documents

**Document types:** None

### Additional Information

**Who can access the data:** Anyone requesting the data

**Types of analyses:** Any purpose

**Mechanisms of data availability:** Inquiry to the email above
